# Supplementary material for: Controlling bacterial contamination during fuel ethanol fermentation using thermochemically depolymerized lignin bio-oils
Source: Royal Society of Chemistry journal article supplement (doi:10.1039/d1gc01521d), 2021-01-01
Supplement: d1gc01521d1.pdf [file d1gc01521d1.pdf]

***Supplemental Information for***

**Controlling Bacterial Contamination During Fuel Ethanol Fermentation Using  
Thermochemically Depolymerized Lignin Bio-Oils**

Ryan M. Kalinoski[a], \*, Wenqi Li[a], Justin K. Mobley[b], Xiaowen Chen[c], Sue E. Nokes [a], Bert C. Lynn [b], Jian Shi[a]

[a]Biosystems and Agricultural Engineering, 128 C.E. Barnhart Building, University of Kentucky,  
Lexington, KY, 40506, USA

[b]Department of Chemistry, 125 Chemistry/Physics Building, University of Kentucky, Lexington, KY,  
40506, USA

[c]National Bioenergy Center, National Renewable Energy Laboratory, 15013 Denver West Parkway,  
Golden, CO, 80401, USA

\*Corresponding to: Dr. Ryan Kalinoski, University of Kentucky  
Email: [rmka232@uky.edu](mailto:rmka232@uky.edu); Phone: (859)-218-4330

**Figure S1:** Scheme of experimental process and general results.

**Figure S2.** DHAP/Li<sup>+</sup> MALDI spectrum of the lignin bio-oil.

**Table S1:** Percent inhibition of 0.088 mg/ml of acetic acid and 0.0000004 mg/ml of peracetic acid individually and together (AA and PAA) after 24 hrs of growth at 32°C. Where percent inhibition values were calculated against a control with 5% ethanol, and all treated samples also had final 5% ethanol concentration. Negative values indicate a positive increase in growth.

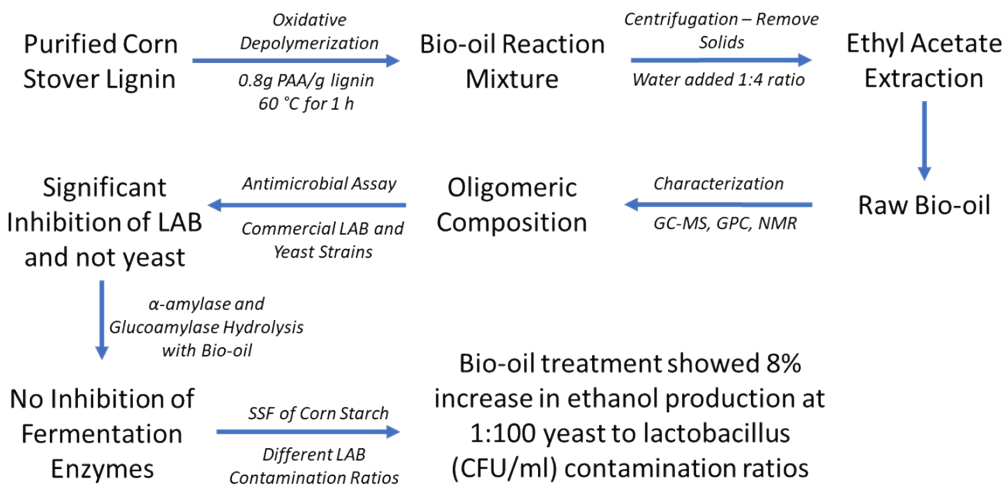

**Figure S1:** Scheme of experimental process and general results.

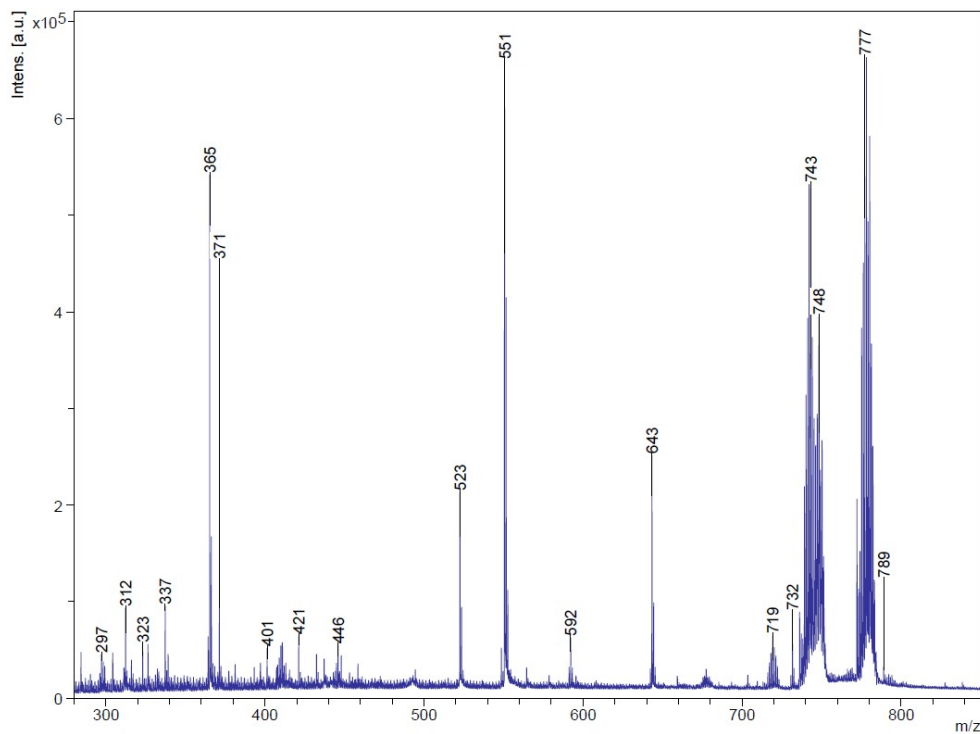

**Supplemental Figure S2:** DHAP/Li<sup>+</sup> MALDI spectrum of the lignin bio-oil

**Table S1:** Percent inhibition of 0.088 mg/ml of acetic acid and 0.0000004 mg/ml of peracetic acid individually and together (AA and PAA) after 24 hrs of growth at 32°C. Where percent inhibition values were calculated against a control with 5% ethanol, and all treated samples also had final 5% ethanol concentration. Negative values indicate a positive increase in growth.

| Sample                             | Acetic Acid | Peracetic Acid | AA and PAA  |
|------------------------------------|-------------|----------------|-------------|
| <i>S. cerevisiae</i> (Fermpro S ®) | -4.21±3.83  | -7.45±5.28     | -11.11±1.11 |
| <i>L. Fermentum</i> (0315-1)       | -0.41±1.35  | 0.79±0.77      | 0.36±0.77   |
